1 **Comparison of Bayesian methods for incorporating adult clinical trial data to improve**  
2 **certainty of treatment effect estimates in children.**

3

4 Walker R<sup>1</sup>, Phillips B<sup>1,2</sup>, Dias S<sup>1</sup>.

5 <sup>1</sup>Centre for Reviews and dissemination, University of York, Heslington, York, YO10 5DD

6 <sup>2</sup>Department of Paediatric Haematology and Oncology, Leeds Teaching Hospitals NHS Trust, Great  
7 George Street, Leeds, LS1 3EX

8 **Abstract**

9 There are challenges associated with recruiting children to take part in randomised clinical trials and  
10 as a result, compared to adults, in many disease areas we are less certain about which treatments are  
11 most safe and effective. This can lead to weaker recommendations about which treatments to  
12 prescribe in practice. However, it may be possible to ‘borrow strength’ from adult evidence to  
13 improve our understanding of which treatments work best in children, and many different statistical  
14 methods are available to conduct these analyses. In this paper we discuss Bayesian methods for  
15 extrapolating adult clinical trial evidence to children. Using an exemplar dataset, we compare the  
16 effect of modelling assumptions on the estimated treatment effect and associated heterogeneity. We  
17 finally discuss the appropriateness of different modelling assumptions in the context of estimating  
18 treatment effect in children.

19

20 **Introduction**

21 There are various challenges associated with conducting randomised control trials (RCTs) to compare  
22 the efficacy and safety of medical interventions in children. A lower disease incidence in children  
23 means fewer patients are eligible to take part in clinical trials and research groups and pharmaceutical  
24 companies are wary of the increased effort which is required to conduct research with this population.

**NOTE: This preprint reports new research that has not been certified by peer review and should not be used to guide clinical practice.**

25 Further to this, young people and/or their parents/carers may not wish to take on the additional burden  
26 and time commitment associated with being in a clinical trial (1) (2).

27 Despite many diseases affecting both adults and children, these challenges mean that when compared  
28 to adults, there are usually fewer RCTs in children and therefore, a greater uncertainty about which  
29 medicines work ‘best’ to treat a particular disease or condition. This can lead to medicines being  
30 licenced (authorised for marketing on the basis of quality, safety and efficacy) in adults some years  
31 before they become available for children (2). Prescribers may also have little alternative but to use  
32 medicines off-label without having direct information to inform their decision. This in turn, can create  
33 inconsistency in which medicines are prescribed to children to treat a particular condition and may  
34 mean that not all children are receiving the most effective treatment available.

35 To inform decision making within healthcare (including which medicines to prescribe for a  
36 condition), RCT evidence is often combined using evidence synthesis techniques, such as meta-  
37 analysis (MA), that take a weighted average of efficacy or safety results from multiple clinical trials  
38 (or studies) to produce a summary estimate of the comparative or relative efficacy (the effect of one  
39 treatment compared to another) of two interventions (3). An extension of this technique is a network-  
40 meta-analysis (NMA), sometimes referred to as a mixed-treatment comparison, that allows for  
41 synthesis of three or more treatments and the simultaneous comparison of each treatment with every  
42 other. NMA can also provide ‘indirect comparisons’ through which estimates of the relative efficacy  
43 or safety of treatments that have not been compared in head-to-head clinical trials are produced,  
44 provided they are present in a ‘connected network’ of treatments i.e., a network where there is a path  
45 between any two interventions with paths formed of randomised comparisons (4).

46 In paediatric research, however, these analyses may still not provide sufficient evidence for healthcare  
47 decision making as the required RCT evidence may be from a small number of patients and form only  
48 a sparse or disconnected network of comparisons, meaning the pooled treatment effect remains  
49 uncertain. To overcome these issues, it may be possible to ‘extrapolate’ or ‘borrow strength’ from  
50 clinical trial evidence in a separate but related population. For the paediatric population, this could be  
51 an adult population. Information from the adult population would be extended to make inference

52 about the efficacy of treatments in children and may reduce the uncertainty of treatment effect  
53 estimates in children. To justify this type of extrapolation, the disease manifestation and progression  
54 of the disease of interest, along with the exposure response relationship (that is the observed effects of  
55 a treatment at different doses) should already be established in children and the similarities and/or  
56 differences with the adult population understood (5).

57 If these conditions are satisfied, ‘borrowing of strength’ from the adult efficacy data can be facilitated  
58 by an extension of Bayesian MA or NMA, referred to as a Bayesian information sharing model  
59 (ISM). Working within a Bayesian framework allows you to combine prior information (e.g., data  
60 from adult clinical trials or clinician's perspective) about a parameter (e.g., the relative treatment  
61 effect), with that from a new study, to produce a ‘posterior probability distribution’ i.e. the revised or  
62 updated probability of an event occurring after taking into consideration new information (6). If no  
63 specific prior information is available, then a vague prior distribution can be specified in the ISM.

64 In order to ‘borrow strength’ from the adult population, ISMs need to make certain assumptions about  
65 the relationship between adult and paediatric populations, in terms of the clinical efficacy of the  
66 treatment (7). This can range from clinical trial information of the adult population being completely  
67 generalisable to the paediatric population, where full information sharing would be appropriate, to the  
68 clinical trial information of the two populations being completely independent of one another and no  
69 information sharing can take place. The extent to which strength is borrowed from one population to  
70 another is then determined by the modelling assumptions, the precision of the data available for the  
71 different populations, and the extent of agreement across data sources (7).

72 In this paper, we use an exemplar dataset of 16 RCTs comparing two anti-sickness regimens for the  
73 prevention chemotherapy induced nausea and vomiting, to investigate how the modelling assumptions  
74 of four different ISMs impact the treatment effect estimates and associated heterogeneity in children.  
75 The ISMs compared in this paper, extend the traditional MA and we discuss the appropriateness of  
76 their assumptions in the context of estimating treatment effect in children.

77

## 78 **Exemplar data set**

79 Information sharing methods were motivated by an exemplar dataset containing outcomes from 16  
80 RCTs (four from paediatric populations and 12 from adult populations) comparing aprepitant (a newer  
81 antiemetic) or fosaprepitant (the intravenous version of aprepitant) with a control regimen of a 5HT3  
82 antagonist + dexamethasone, for the treatment of chemotherapy induced nausea and vomiting.

83 To create this dataset, we identified RCTs from a recent clinical antiemetic guideline from the  
84 Paediatric Oncology Group of Ontario (POGO) (8) and the Multinational Association for Supportive  
85 Care in Cancer (MASCC) (9). Data were commonly reported as the proportion of patients  
86 experiencing a ‘complete response’ i.e., no vomiting, from the point of chemotherapy administration,  
87 up to five days afterwards. These data were extracted and converted into the number of participants  
88 *experiencing* a vomiting event in the treatment and in the control arm. A table of study characteristics  
89 and extracted outcome data is provided in the supporting information S1.

90 As the incidence of cancer in children is much rarer than in adults, but the therapeutic chemotherapies  
91 used are often the same, and the effects of antiemetic medications are clinically believed to be similar,  
92 it was considered appropriate to explore information sharing methods for this example.

## 93 **Methods**

### 94 **The MA model**

95 In the standard MA model for each study  $i$  and each arm  $k$ , the binary data in the form of events  $r_{ik}$   
96 and total number of patients  $n_{ik}$ , are described as coming from a binomial likelihood:

97

$$98 \quad r_{ik} \sim \text{Binomial}(p_{ik}, n_{ik})$$

99

100 where  $p_{ik}$  is the probability of an event in arm  $k$  of study  $i$ , modelled on the log-scale and defining the  
101 linear predictor  $\theta_{ik}$  i.e., the log risk of an event in arm  $k$  of trial  $i$ :

102

$$103 \quad \log(p_{i,k}) = \theta_{i,k} = \mu_i + \min(\delta_{i,k} - \log(p_{i,1})) \quad (1)$$

104

105 where  $\mu_i$  is the study specific baseline treatment effects (i.e., the baseline risk of an outcome, which  
106 must be positive) in arm 1 of trial  $i$ , defined as  $\mu_i = \log(p_{i,1})$  where  $p_{i,1}$  is given a vague prior  
107 distribution (Uniform(0,1)),  $\delta_{i,k}$  is the study specific relative treatment effect (i.e. the log risk ratio) of  
108 the treatment in arm  $k$  compared to the treatment in arm 1 *in that trial* where the relative effect of a  
109 treatment compared to itself, is set to zero:  $\delta_{i,1} = 0$ .

110 Models can be specified as having a common/fixed effect, where it is assumed that all studies estimate  
111 the same relative effect i.e. the relative effect is not expected to differ between study populations  
112 included in the analysis; or models may have random effects, where relative effects of studies are  
113 assumed exchangeable or similar, i.e. the relative effect is expected to differ between study  
114 populations included in the analysis, but is expected to fall within a certain range or distribution (3).

115 For random effects model the study specific relative treatment effects are assumed to be drawn from a  
116 normal distribution with a common mean and between trial variability (i.e., the heterogeneity  
117 parameter)  $\tau^2$ . As we are only comparing two treatments in our application the common mean  $d_{1,2}$ ,  
118 represents the pooled relative effect of the treatment regimen 2 (aprepitant/fosaprepitant + a 5HT<sub>3</sub>  
119 antagonist + dexamethasone) compared to the comparator treatment regimen 1 (a 5HT<sub>3</sub> antagonist +  
120 dexamethasone) :

121 
$$\delta_{i,k} = \text{Normal}(d_{1,2}, \tau^2) \quad (2)$$

122

123 The parameter  $d_{1,2}$  is to be estimated and given a non-informative prior:  $d_{1,2} \sim \text{Normal}(0, 100^2)$ .

124 For the fixed effects model equation 2 is replaced by:

125 
$$\delta_{i,k} = d_{1,2} \quad (3)$$

126

127

## 128 **Bayesian information sharing models**

129 We now describe the four ISMs compared in this paper. These ISMs differ in parameters in which  
130 they share information: either relative treatment effects, or between study heterogeneity (for random  
131 effects models). As a result, different assumptions are made about the relationship between the two  
132 populations and different amounts of information are shared between them.

133 N.B ISMs that relate the parameters of the evidence sets using an exchangeability-based relationship  
134 (where a common distribution is imposed on the parameters e.g., in the multilevel models and the  
135 random walk model) are most useful when there are multiple sources of evidence (7). As we are only  
136 considering two populations, these models are not discussed in this paper.

### 137 **The splitting model**

138 The first model we implement is the splitting model, which simply extends the standard MA model to  
139 accommodate the inclusion of two evidence sets but estimates model parameters separately for each  
140 population  $j$  (7).

141 For the random effect model, equation 2 is edited to include population specific parameters:

$$142 \quad \delta_{i,k} = \text{Normal}(d_{j,1,2}, \tau^2)$$

143 where  $j$  defines the population.  $j = 1$  when study index  $i = 1, \dots, \text{nsA}$  (indicating the adult studies),  
144 and  $j = 2$  when  $i = \text{nsA} + 1, \dots, \text{nsA} + \text{nsC}$  (indicating the children studies), where  $\text{nsA}$  is the number  
145 of adult studies and  $\text{nsC}$  is the number of children studies.

146 For the fixed effects model, equation 3 is edited to include population specific parameters:

$$147 \quad \delta_{i,k} = d_{j,1,2} \quad (4)$$

148 The treatment effects for population  $j$  are given vague priors:  $d_{j,1,2} \sim \text{Normal}(0, 100^2)$ .

149 As such, one MA is performed on the adult data, and another on data from the children, although both  
150 analyses are conducted simultaneously. In the random effects model, information on between-study  
151 heterogeneity is shared between populations and is assumed the same for adults and children i.e., the

152 variation in treatment effect between clinical trials is assumed the same in the adult and paediatric  
153 populations (although other assumptions could also be imposed e.g., that heterogeneity in children is  
154 proportional to adults). This produces a marginal benefit, in terms of supporting the estimation of  
155 treatment effect in children, as when there are few children studies there is little information about the  
156 variation in treatment effect between studies.

157 The fixed effect version of this model does not share any information between the populations, rather  
158 it estimates the treatment effects separately in adults and children, assuming they are completely  
159 independent of each other (see equation 4).

160

### 161 **Functional relationship models**

162 This ISM assumes parameters are related using a deterministic function i.e. assuming that the relative  
163 effect in one population can be written as a function of the relative effect in the other (7):

$$164 \quad d_{Child} = f(d_{Adult}) \quad (5)$$

165 Where  $d_{Child}$  is the parameter that relates to the children's evidence and  $d_{Adult}$  the parameter that  
166 relates to the adult evidence. The function  $f()$  can take different forms. Here we explore two  
167 relationships.

168 **The 'lumping' model**, 'lumps' the data together from the evidence sets and therefore assumes the  
169 adult data is completely generalisable to the children i.e., the function in equation 5 is the identity  
170 function and there is no difference in the relative effect between the two populations. This is  
171 equivalent to not distinguishing between adult and paediatric data and carrying out a simple meta-  
172 analysis using all the data.

173 **The proportional effects model**, assumes that the relative risk estimated in children is proportional to  
174 the relative risk estimated in the adult population, so that there is an additive relationship on the log  
175 relative risk scale:

$$176 \quad d_{2,1,2} = d_{1,1,2} + \lambda$$

177 A vague prior distribution is specified for the relative treatment effect in adults on the log relative risk  
178 scale  $d_{1,1,2} \sim (\text{Normal}(0,100^2))$  and the change (in the log-RR scale in children) is measured by a  
179 parameter lambda ( $\lambda$ ), which is also given a vague prior distribution  $\lambda \sim (\text{Normal}(0,100^2))$  (although an  
180 informative prior could be used for  $\lambda$  if appropriate). In this model, information sharing takes place  
181 from adult to children but also vice-versa. An alternative way of implementing this model is through  
182 modifying the BUGS code to include of a ‘cut’ function (4)(see supporting information S2).

183

### 184 **Meta-regression**

185 An alternative model is where the two populations are indicated by a binary study-level covariate and  
186 a regression parameter i.e., the difference in treatment effect between the two populations, is  
187 estimated. Here the linear predictor (equation 1) is modified as follows (10):

$$188 \quad \theta_{i,k} = \mu_i + \delta_{i,k} + \beta_{Ik} * X_i$$

189 Where  $\beta_{Ik}$  is the covariate effect of the indirect or (or adult) population  $X_i$  on the treatment effect.  
190 This model allows for a test of interaction between the relative treatment effect and the binary study  
191 level covariate that identifies the adult population. This will assess whether the relative treatment  
192 effect is dependent on data arising from the adult or children’s population. In this model, information  
193 sharing only occurs in random effects models where the heterogeneity is assumed equal across  
194 populations. In a fixed effect model this is equivalent to a subgroup analysis.

195

### 196 **Implementation**

197 All analyses were carried out in OpenBUGS version 3.2.2 (11) and code to implement all models can  
198 be found in the supporting information S2. Whilst we include only one treatment comparison in our  
199 analyses (equivalent to a pairwise meta-analysis) and only two arm trials, the code provided in the  
200 supporting information S2 will accommodate multiple treatment comparisons and studies with three  
201 or more arms whilst adequately accounting for multiple random effects that are correlated (see (4)).

202 Separate MA models were conducted for adults and for children, followed by the four ISMs. For all  
203 models, vague prior distributions were used for all trial baselines and for relative treatment effects  
204 (Normal(0,100<sup>2</sup>)). For random effects models, a minimally informative prior distribution  
205 (Uniform(0,2)) was used for the between-study heterogeneity parameter. Results are based on 50,000  
206 interactions on three chains after a burn-in of 10,000. Convergence was assessed visually by checking  
207 the mixing of chains. Model fit statistics including the deviance information criteria, and total residual  
208 deviance from each ISM model, along with treatment effect estimates and associated heterogeneity  
209 (and 95% credible intervals) were compared to those from the separately applied NMAs for adults and  
210 for children.

211

## 212 **Results**

213 Table 1 presents treatment effect estimates and model fit statistics from both fixed and random effects  
214 models analysing data from adults and children's populations separately, and together, using the four  
215 proposed models. The 'lumping' model, which assume relative effects in both populations are the  
216 same, produced treatment effect estimates closer to those of the MA using adult only data and had a  
217 larger between study heterogeneity compared to the other models, suggesting heterogeneity might be  
218 explained by assuming a less restrictive relationship for the relative effects across the populations.  
219 The splitting model (with shared heterogeneity when random effects are considered), proportional  
220 effects and meta-regression model, produced estimates for adults and children comparable to the MAs  
221 conducted separately for the populations and the precision of the treatment effect estimate for children  
222 produced by the random effects model was improved in all models. Although there was little change  
223 in precision in fixed effect models, model fit was slightly improved (residual deviances were closer to  
224 the number of data points) compared to the lumping model. Across all information sharing models,  
225 fixed effects and random effects models produced comparable DICs. The total residual deviance was  
226 marginally lower for the random effects models (table 1), although differences were small meaning  
227 that in general the simplest of the two models (i.e., the fixed effect model with no additional  
228 parameters – 'lumping model') would be selected.

229    Lambda and beta estimates, indicating the difference between the treatment effect estimates in children  
230    and adults are comparable, with both models estimating a 14% and 13% increase in the relative risk  
231    for children compared to adults, for the fixed and random effects models respectively, although the  
232    95% CrI for the latter includes the possibility of no difference in effects across the populations for  
233    both models (table 1).

234 Table 1. Results from MA and ISM models comparing aprepitant or fosaprepitant to control regimen for the treatment of chemotherapy induced nausea and vomiting.

| Model                             | Number of data points | Fixed effect model     |       |            | Random effect model    |                                  |       |            |
|-----------------------------------|-----------------------|------------------------|-------|------------|------------------------|----------------------------------|-------|------------|
|                                   |                       | RR (95%CrI)            | DIC   | totresdev* | RR (95%CrI)            | Between-study heterogeneity (SD) | DIC   | totresdev* |
| Adults' data only                 | 24                    | 0.672 (0.626 to 0.720) | 165.7 | 23.72      | 0.672 (0.614 to 0.731) | 0.064 (0.005 to 0.189)           | 167.2 | 22.88      |
| Children's data only              | 8                     | 0.768 (0.689 to 0.849) | 48.6  | 11.32      | 0.754 (0.468 to 1.1)   | 0.287 (0.01 to 1.140)            | 48.1  | 8.54       |
| <b>INFORMATION-SHARING MODELS</b> |                       |                        |       |            |                        |                                  |       |            |
| Lumping model                     | 32                    | 0.698 (0.656 to 0.740) | 215.7 | 37.55      | 0.695 (0.638 to 0.751) | 0.079(0.008 to 0.198)            | 215.7 | 32.76      |
| Splitting model**                 |                       |                        |       |            |                        |                                  |       |            |
| Adults                            | 32                    | 0.672 (0.626 to 0.720) | 214.3 | 35.04      | 0.673 (0.616 to 0.733) | 0.052(0.003 to 0.181)            | 215.3 | 33.02      |
| Children                          |                       | 0.767 (0.687 to 0.849) |       |            | 0.762 (0.656 to 0.862) |                                  |       |            |
| Proportional effects model        |                       |                        |       |            |                        |                                  |       |            |
| Adults                            | 32                    | 0.671 (0.626 to 0.720) | 214.3 | 35.05      | 0.673 (0.614 to 0.733) | 0.066 (0.005 to 0.184)           | 215.4 | 32.9       |
| Children                          |                       | 0.766 (0.687 to 0.848) |       |            | 0.758 (0.652 to 0.861) |                                  |       |            |
| Lambda (relative risk scale)      |                       | 1.143 (1.004 to 1.291) |       |            | 1.129 (0.948 to 1.315) |                                  |       |            |
| Meta-regression**                 |                       |                        |       |            |                        |                                  |       |            |
| Adults                            | 32                    | 0.672 (0.626 to 0.720) | 214.2 | 35.02      | 0.671 (0.618 to 0.731) | 0.066 (0.003 to 0.183)           | 215.3 | 32.82      |
| Children                          |                       | 0.766 (0.685 to 0.847) |       |            | 0.761 (0.655 to 0.862) |                                  |       |            |
| Beta (relative risk scale)        |                       | 1.139 (1.000- 1.290)   |       |            | 1.125 (0.950-1.028)    |                                  |       |            |

235 \* compare to the number of data points, \*\*Fixed effect model does not share information.

236

## 237 **Discussion**

238 In situations where the disease manifestation and progression, along with the exposure response  
239 relationship of a treatment is understood in children, ISMs could help to overcome the scarcity of  
240 clinical effectiveness evidence in this population, by including adult data into analyses(5). As ISMs  
241 may improve the precision or certainty of the relative treatment effect estimates in children, the  
242 analyses could maximise the usefulness of an existing evidence base in children to inform decisions  
243 about which treatment to prescribe for paediatric diseases and or illnesses. In this work we have  
244 compared the relative treatment effects and associated heterogeneity produced by different ISMs that  
245 incorporated adult data, to estimates from a MA using only data from children.

246 We found that when treatment effect estimates for children produced by the model that does not  
247 distinguish between populations ('lumping model') were compared to those produced by the MAs  
248 conducted separately for children, the estimates were closer to those from the adults MA. This is  
249 because there are more studies in the adult population and therefore the results are dominated by the  
250 adult information. In the random effect model the between study-heterogeneity was greater than that  
251 of the other information sharing models (Table 1). This is due to the assumption that the relative  
252 treatment effect and heterogeneity are equal for both populations and therefore the model needs to  
253 account for the additional heterogeneity resulting from pooling adult and paediatric data. Thus, we  
254 consider the 'lumping model' is likely not an appropriate choice, particularly when there is potential  
255 for differences in relative treatment effect between adults and children, as pooled estimates produced  
256 for children may not reflect the true effectiveness of the treatment in this population.

257 The 'splitting' model produced very similar treatment effect estimates to the MAs conducted using  
258 only children's data. For the fixed effect model, this is expected as the model does not share  
259 information between the populations. While perhaps safest, in terms of not mistakenly assuming  
260 similarity in clinical efficacy, this maintains the status-quo of evidence sparsity for children. The  
261 random effect model shares information on the between study heterogeneity and therefore estimated  
262 this parameter in children more precisely than when the MA is conducted separately for children  
263 (Table 1), as it is able to borrow information from the adult data to better estimate the parameter. We

264 note that the plausibility of this assumption (in our example, that the spread of effects in antiemetic  
265 trials in children would be the same as seen in adults), would need to be considered by paediatrics  
266 oncology experts. If considered appropriate, this model may be useful for reducing the uncertainty  
267 around treatment effect estimates when there are very few RCTs in children and a random effects  
268 model is considered appropriate.

269 The proportional effects model, which estimates the difference ( $\lambda$ ) between the treatment effects  
270 across the two populations, produced comparable relative effects estimates to the MAs containing  
271 only children's data (Table 1). This model is particularly advantageous, as it is able to include the  
272 adult data to support the sample size in the paediatric population, without assuming that the relative  
273 effectiveness is identical. This may be the 'safer' option when extrapolating from adult clinical trial  
274 data, as the efficacy of medications may vary from that of children due to differences in the way that  
275 medicines are absorbed, distributed, metabolised, and excreted in the body (2) (12).

276 However, in the proportional effects model, information sharing takes place from adult to children but  
277 also vice-versa, which may not be desirable. When the model was modified to prevent the data from  
278 the children affecting the estimate of the adult population, results were comparable to the MAs  
279 containing only data from children (see Supporting information S3). This modification may be helpful  
280 when adult data are particularly abundant and it is, therefore, not necessary, or desirable for the  
281 children's data to influence adult relative effect estimates or decisions already made for adults.

282 Finally, the meta-regression model that estimates the effect of a binary covariate (adult/child) on the  
283 treatment outcome, again produced comparable results to the MAs containing only children's data and  
284 produced very similar estimates to the proportional effects model. This is expected as both models are  
285 estimating conceptually similar parameters in different ways, the proportional effects model estimates  
286  $\lambda$  as an unknown parameter from the treatment effect estimates, whilst the meta-regression model  
287 includes the adult/children as a binary study-level covariate in the linear predictor, then estimates the  
288 difference in treatment effect between adults and children. The meta-regression model may be  
289 particularly useful to explore further differences in treatment effect between adults and children. The  
290 model can be extended to include baseline risk or other covariate in the model, to understand whether

291 differences are attributable to differences in underlying risk or other population differences. The code  
292 to implement this model can be found in the supporting information S2.

293 Of the methods discussed, we would advocate the use of the proportional effects or meta-regression  
294 models to incorporate adult data into analyses that estimate the relative effectiveness of treatments in  
295 children, as these methods can account for the scenario where children's responses to medical  
296 intervention differs from adults, and this difference can be quantified by parameters estimated from  
297 the data. Although not explored in this paper, there are alternative ISMs available that can impose  
298 constraints on the relationship between the adult and child population e.g., assuming the relative  
299 effectiveness of one population is assumed to be larger or smaller than another or is expected to  
300 follow a particular mathematical function, however for these to be considered appropriate in the  
301 context of 'borrowing strength' from adult data, a substantial amount of previous knowledge and  
302 clinical advice would be required to make such assumptions with confidence.

303 We have shown ISM methods can improve the certainty of clinical effectiveness estimates in the  
304 paediatric population. However, we note that that the performance of the methods can differ under  
305 different conditions e.g., when used with datasets with different features and different network  
306 structures (10). Ultimately, improving the certainty of estimates in children may help to reduce the  
307 need for additional RCTs in children, and aid clinicians and patients in making treatment decisions,  
308 from the existing evidence base. The models may also be used to facilitate prediction of the effect of  
309 new treatments in children (through estimation of a prediction interval) for example, if models such as  
310 the 'proportional effects model' or 'meta-regression model' showed treatment effect estimates of  
311 current treatments options were consistent between adults and children, (either consistently similar or  
312 had similar differences across comparisons). These predictions could then lead to smaller trials being  
313 required to confirm the relative effects of new drugs in children, which could improve the evidence-  
314 base in this population and lead to faster approval and uptake of effective treatments.

315 **Limitations**

316 Here we have focused on simple approaches to information sharing in pairwise meta-analysis,  
317 however, other methods have been proposed, namely using the external data as prior information (13)  
318 or model averaging approaches (14) to combine the different evidence sources, which we have not  
319 evaluated in this paper.

320 Our work uses an example dataset containing only trials making the same treatment comparison.  
321 Collecting data to form a full network of treatments where direct and indirect evidence is available  
322 (within populations), could result in stronger evidence and the potential for more information sharing.  
323 It would also allow for testing further assumptions e.g., whether relative treatment effects are similar  
324 for adults/children across multiple treatments or within a class of treatments but not another.

325

326 **Authors roles**

327 RW was responsible for the conceptualization, methodology, data curation, formal analysis, software  
328 programming, preparation and presentation of the published work and writing of the original draft for  
329 publication.

330 SD was involved in the conceptualization, methodology, formal data analysis, supervision and  
331 reviewing and editing the published work.

332 BP was involved in the conceptualization, methodology, supervision and reviewing and editing the  
333 published work.

334

335 **Reference list**

336

337 1. Hein IM TP, de Vries MC, Knibbe CA, van Goudoever JB, Lindauer RJ. Why do children  
338 decide not to participate in clinical research: a quantitative and qualitative study. *Pediatric Research*.  
339 2015;78.

340

- 341 2. Gamalo-Siebers M SJ, Basu C, Zhao X, Gopalakrishnan M, Gao A, et al. Statistical modeling  
342 for Bayesian extrapolation of adult clinical trial information in pediatric drug evaluation. .  
343 *Pharmaceutical Statistics* 2017; . 2017;16:232-49.  
344
- 345 3. Deeks JJ, Higgins, J.P., Altman, D.G. Analysing data and undertaking meta-analyses. In  
346 *Cochrane Handbook for Systematic Reviews of Interventions* (J.P. Higgins JT, J. Chandler, M.  
347 Cumpston, T. Li, M.J. Page and V.A. Welch, editor)2019.  
348
- 349 4. Dias S WN, Jansen JP, Sutton A. *Network Meta-analysis for Decision Making*: Wiley & Sons  
350 ltd; 2018.  
351
- 352 5. Ollivier C, Thomson, A, Manolis, E, et al. Commentary on the EMA Reflection Paper on the  
353 use of extrapolation in the development of medicines for paediatrics. *Br J Clin Pharmacol*.  
354 2019;85:659– 68.  
355
- 356 6. Spiegelhalter DJ MJ, Jones DR, Abrams KR. *Methods in health service research. An*  
357 *introduction to bayesian methods in health technology assessment*. *BMJ*. 1999;21((7208)):508-12.  
358
- 359 7. Nikolaidis GF wB, Palmer S, Soares M. Classifying information-sharing methods. *BMC*  
360 *Medical Research Methodology* 2021(21).  
361
- 362 8. Patel P, Robinson PD, Thackray J, Flank J, Holdsworth MT, Gibson P, et al. Guideline for the  
363 prevention of acute chemotherapy-induced nausea and vomiting in pediatric cancer patients: A  
364 focused update. *Pediatric Blood & Cancer*. 2017;64.  
365
- 366 9. Roila F MA, Herrstedt J, Aapro M, Gralla RJ, Bruera E, et al. MASCC and ESMO guideline  
367 update for the prevention of chemotherapy- and radiotherapy-induced nausea and vomiting and of  
368 nausea and vomiting in advanced cancer patients. *Annals of Oncology* 2016. 2016;27:119-33.  
369
- 370 10. Nikolaidis G. *Borrowing strength from 'indirect' evidence: methods and policy implications*  
371 *for health technology assessment*. : University of York.; 2020.  
372
- 373 11. Lunn D. S, D., Thomas, A. and Best, N. The BUGS project: Evolution, critique and future  
374 directions. . *Statist Med*, . 2009;28: :3049-67.  
375
- 376 12. O'Hara K. Paediatric pharmacokinetics and drug doses. *Aust Prescr*. 2016;39:208-10.  
377
- 378 13. Best N PR, Pouliquen IJ, Keene ON. . Assessing efficacy in important subgroups in  
379 confirmatory trials: An example using Bayesian dynamic borrowing. *Pharm Stat*. 2021 May;.  
380 2021;20:551-62.  
381
- 382 14. Röver C, Wandel, S, Friede, T. Model averaging for robust extrapolation in evidence  
383 synthesis. *Statistics in Medicine*. 2019;38:674– 94.
